# Supplementary material for: Light-Emitting Diodes Modify Medicinal Quality of Mown Rabdosia rubescens, with Changes in Growth, Physiology, and Antioxidant Activity, under Drought Stress
Source: MDPI journal article supplement (doi:10.3390/plants12183189), 2023-09-06
Supplement: s1 [file s1]

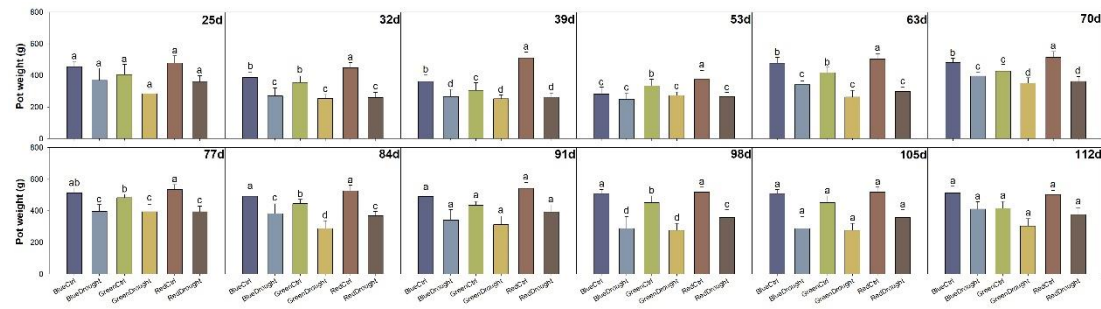

**Figure S1.** Dynamics of weight in potted *Rabdosia rubescens* seedlings exposed to combined LED spectra and drought stress. A column presents an average of eight replicates (tanked pots of seedlings) and error bars mark standard errors. Different letters indicate significant difference according to Tukey test at 0.05 level in a sampling day. Red, Blue, and Green are abbreviations of LED light colors; Ctrl, a well-watered control; Drought, drought stress. Days mark post-transplant periods.
